# Supplementary material for: Differential activity of MAPK signalling defines fibroblast subtypes in pancreatic cancer
Source: PubMed Central journal article supplement — Nat Commun. 2024 Dec 3;15:10534. doi: 10.1038/s41467-024-54975-8 (PMC11615044; doi:10.1038/s41467-024-54975-8), 2024-12-03
Supplement: 41467_2024_54975_MOESM1_ESM.pdf [file 41467_2024_54975_MOESM1_ESM.pdf]

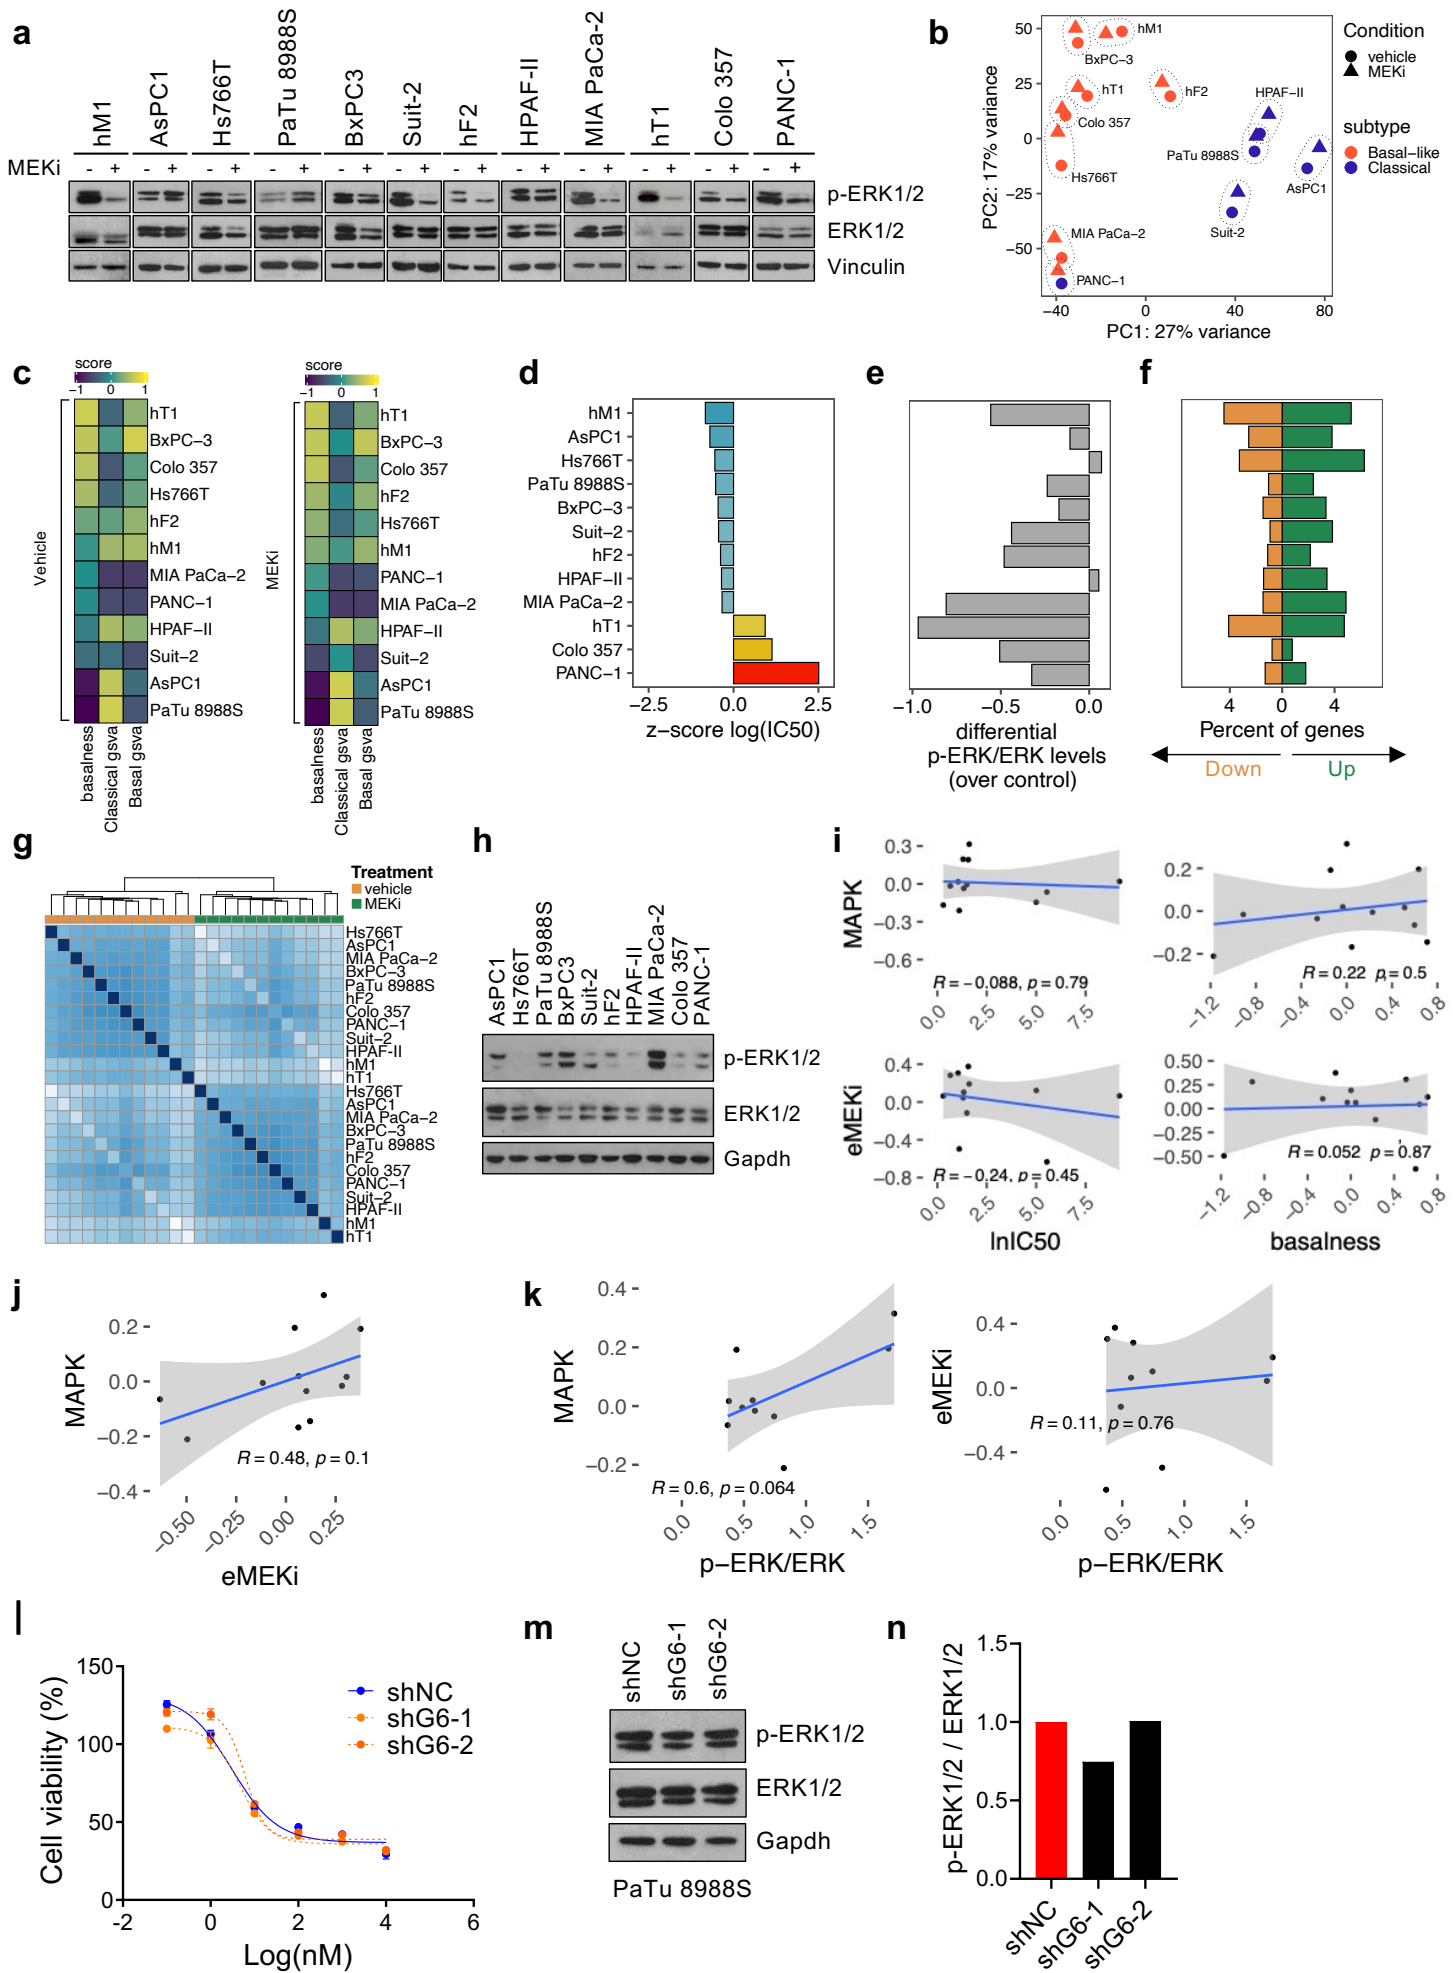

**Supplementary Figure 1: Short-term MEK inhibition does not affect PDAC epithelial subtype.** **a** Immunoblot of phospho-ERK1/2 and total ERK1/2 in whole cell lysates of 12 human PDAC cell lines after 48 hours of MEKi treatment with sub-IC50 doses. Vinculin, loading control. **b** Principal Component Analysis (PCA) of RNA-seq data from 12 human cell lines treated with vehicle or MEKi for 2 days, classified as classical or basal-like according to Moffitt's subtypes<sup>1</sup>. **c** Heatmaps displaying the individual GSVAscore for basal-like and classical signatures, and the "basalness" score (computed as subtraction of the GSVAscore\_Moffitt\_Classical\_score to the GSVAscore\_Moffitt\_Basal\_score). **d** Barplot showing the z-score (Log IC50) for MEKi sensitivity of 12 human PDAC cell lines ordered top-to-bottom from the most sensitive to the least sensitive. **e** Barplot showing the differential phospho-ERK levels following MEKi (from panel a, Source data are provided as Source Data file). **f** Barplot showing the percentage of up- and down-regulated genes in 12 PDAC cell lines treated with MEKi for 2 days. **g** Heatmap illustrating transcriptional similarity between cell lines after batch correction, showing transcriptional changes induced by MEKi. **h** Immunoblot of phospho-ERK1/2 and total ERK1/2 in whole cell lysates of human PDAC cell lines. GAPDH, loading control. **i** Scatter plots showing correlation between MAPK transcriptional signatures and "basalness" or MEKi sensitivity (lnIC50) for 12 human cancer cell lines. p value from *r* correlation test. Grey area represents 95% (CI). **j** Scatter plot showing the correlation between the two MAPK transcriptional signatures. p value from *r* correlation test. Grey area represents 95% CI. **k** Scatter plots showing the correlation between MAPK transcriptional signatures and basal p-ERK levels in 10 human cancer cell lines. p value from *r* correlation test. Grey area represents 95% CI. **l** MEKi dose-response curve for a 3-day cell-titer-glo assay with PaTu 8988S transduced with mock (shNC) or GATA6-targeting shRNAs (shG6-1, shG6-2). **m** Immunoblot of phospho-ERK1/2 and total ERK1/2 in whole cell lysates of PaTu 8988S transduced with mock (shNC) or shRNAs targeting GATA6 (shG6-1, shG6-2). **n** Barplot showing the quantification of relative phospho-ERK1/2 level shown in Supplementary Fig. 1m. n = 2 biological replicates.



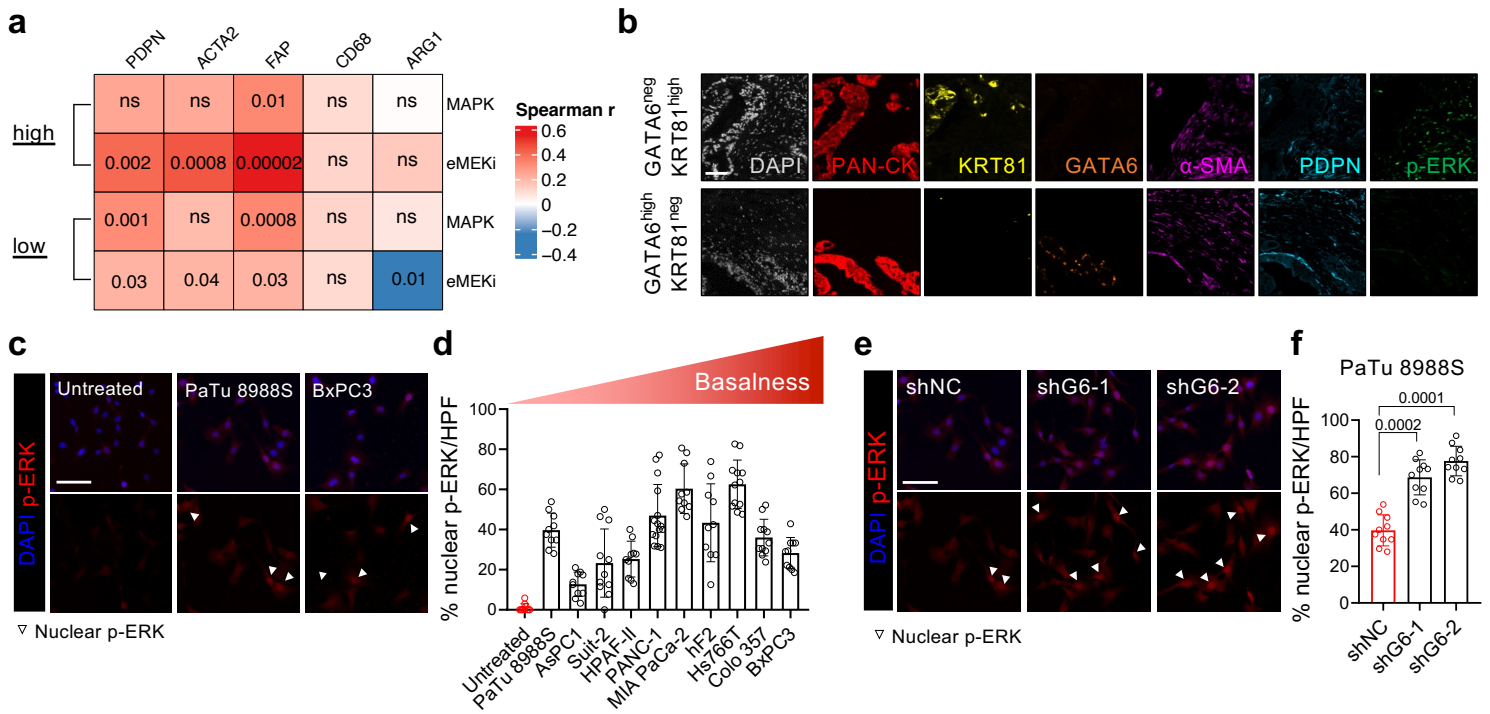

### Supplementary Figure 2: p-ERK<sup>+</sup> fibroblasts are associated with basal-like cancer cells. a

A Heatmap showing Spearman's correlation between gene signatures and selected markers for fibroblasts and macrophages in samples from the TCGA cohort<sup>2</sup>, stratified by neoplastic cell content (high > 40%). **b** Representative areas from Fig. 1b showing individual fluorescence channels. Scale bar, 100  $\mu$ m. **c** Representative Immunofluorescence staining of p-ERK1/2 on mPSCs FBS-starved for 6 hours (untreated) and treated for 10 minutes with conditioned media from cell lines with different "basalness" levels. Nuclei were counterstained with DAPI (blue). Scale bar, 100  $\mu$ m. **d** Scatter dot plot showing the percentage of cells with nuclear p-ERK per field of visualization (FOV;  $n \geq 10$ /condition). Results presented as mean values  $\pm$  S.D. **e** Representative Immunofluorescence staining of p-ERK on mPSCs (as in c) treated with conditioned media from PaTu 8988S transduced with either mock (shNC) or shRNAs targeting GATA6 (shG6-1, shG6-2). Scale bar, 100  $\mu$ m. **f** Scatter dot plot showing nuclear p-ERK quantification. p values determined by Mann Whitney test (two-sided). PaTu 8988S transduced with shNC was used as baseline in Supplementary Fig. 2 c, d . ( $n \geq 10$  FOV /condition). Results presented as mean values  $\pm$  S.D.

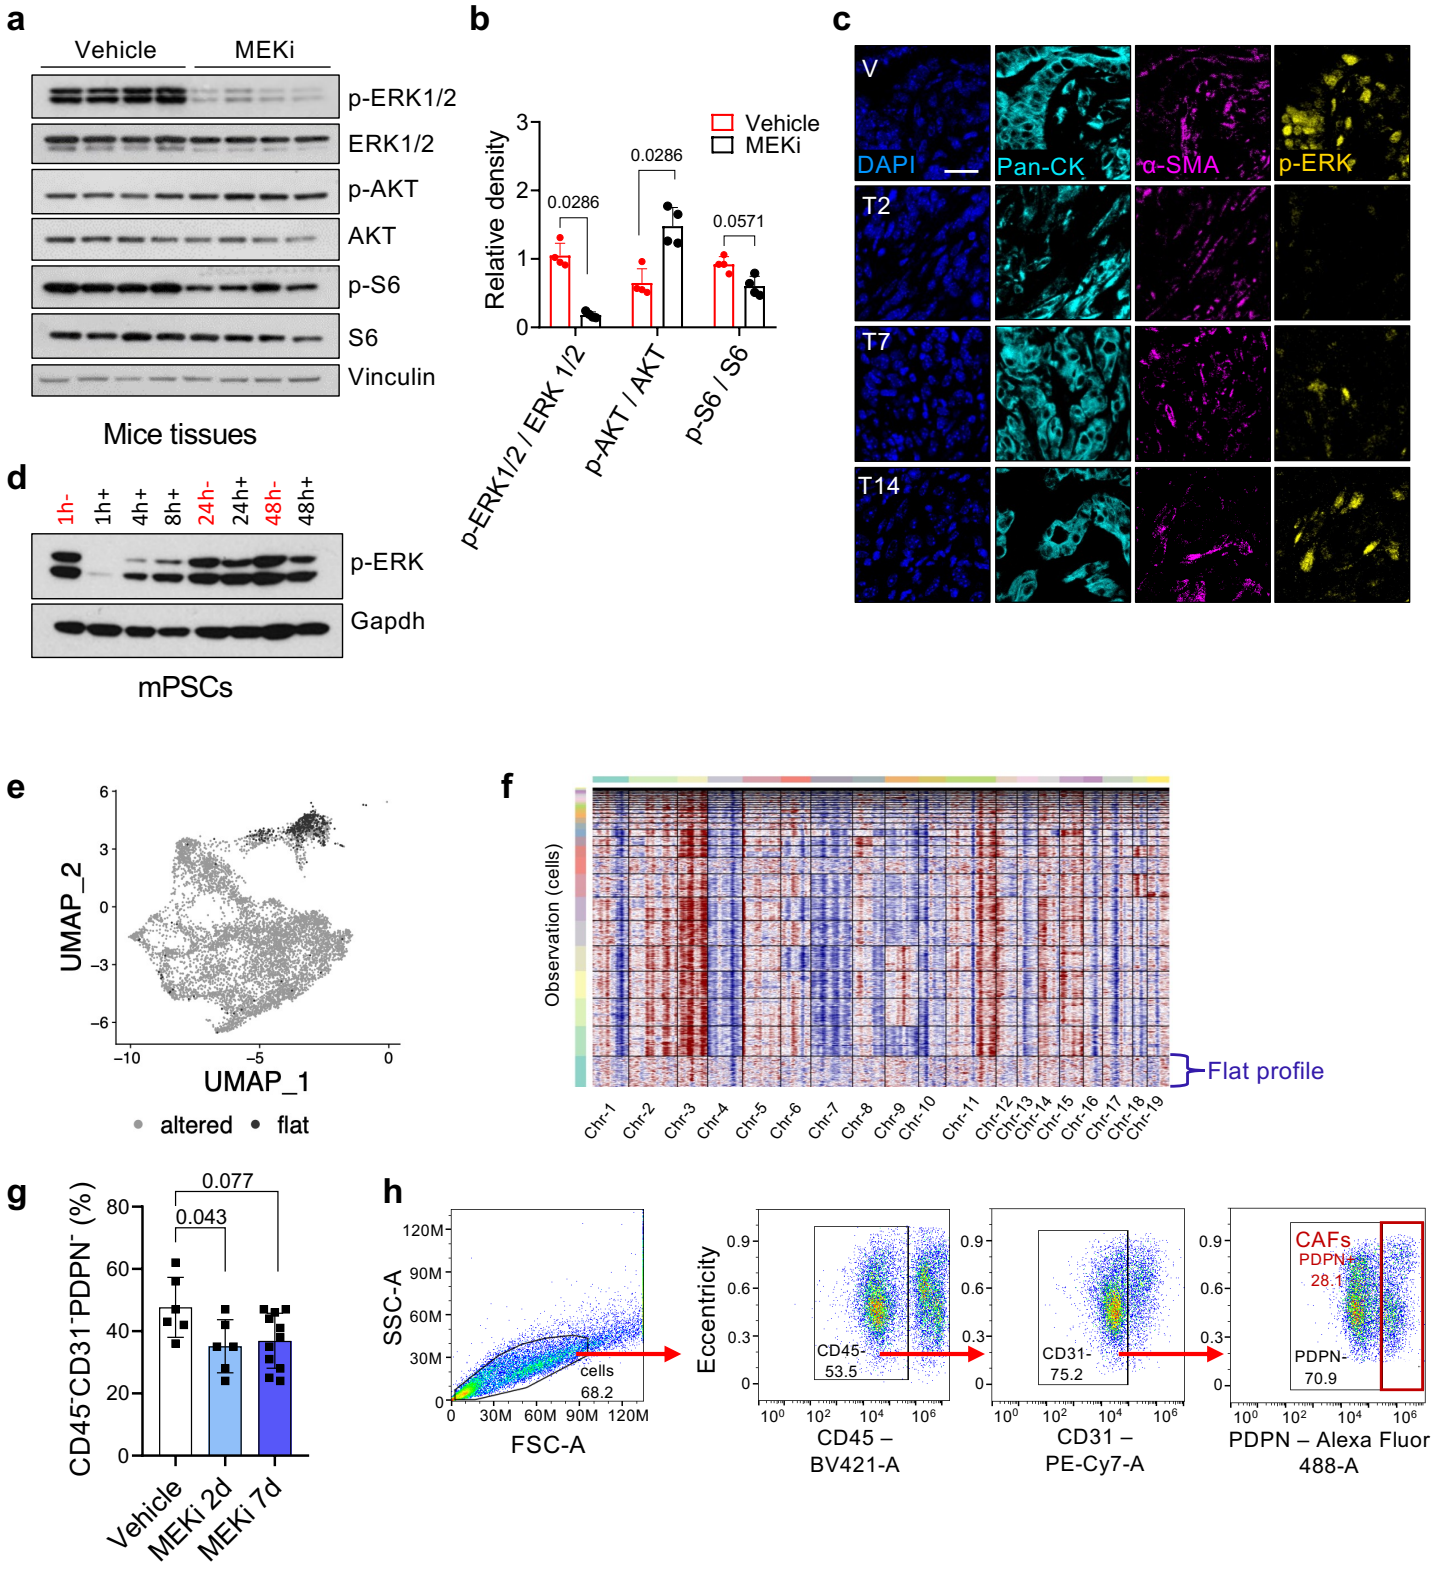

**Supplementary Figure 3: MEK inhibition is efficient at 2 days of treatment and increases the stroma content *in vivo*.** **a** Immunoblot of p-ERK1/2, total ERK1/2, p-AKT, total AKT, p-S6, and total S6 in whole-tumour lysate from mice treated for 2 days either with vehicle (n = 4 mice) or MEK inhibitor 1 mg/kg (n = 4 mice). Vinculin was used as loading control. **b** Scatter dot plot showing the quantification of changes in the phosphorylated levels of proteins (p-ERK1/2, p-AKT, and p-S6) shown in Supplementary Fig. 3a. p values as determined by Mann Whitney test (two-sided). n = 4 mice/ condition. Results presented as mean values  $\pm$  S.D. **c** Representative areas from Fig. 2b displaying individual fluorescence channels for mice treated with vehicle (C), MEKi for 2 (T2), 7 (T7), and 14 (T14) days. Scale bar, 25  $\mu$ m. **d** Immunoblot of p-ERK1/2 in whole-cell lysate from mPSCs treated with either vehicle (red) or MEKi at different timepoints. GAPDH was used as loading control. **e** UMAP plot showing cells from the epithelial cluster coloured according to copy number profile (grey, altered; black, flat). **f** Representative heatmap showing inferred amplifications (red) and deletions (blue) for the sample T7 (mice treated for 7 days with MEKi) from transcriptomic data for each cell (rows) over the genomic positions (columns). Horizontal black line show cells hierarchical clustering based on CNV profile. **g** FACS analysis of tumour tissues from tumour-bearing mice treated with MEKi for 2 or 7 days. The barplots show the percentage of live cells calculated on the total of immune (CD45<sup>+</sup>) and stromal (CD31<sup>+</sup> and PDPN<sup>+</sup>) cells. n  $\geq$  6 mice/condition. Results presented as mean values  $\pm$  S.D. **h** Flow plots showing the gating strategy used in Fig. 2i and Supplementary Fig. 2g.

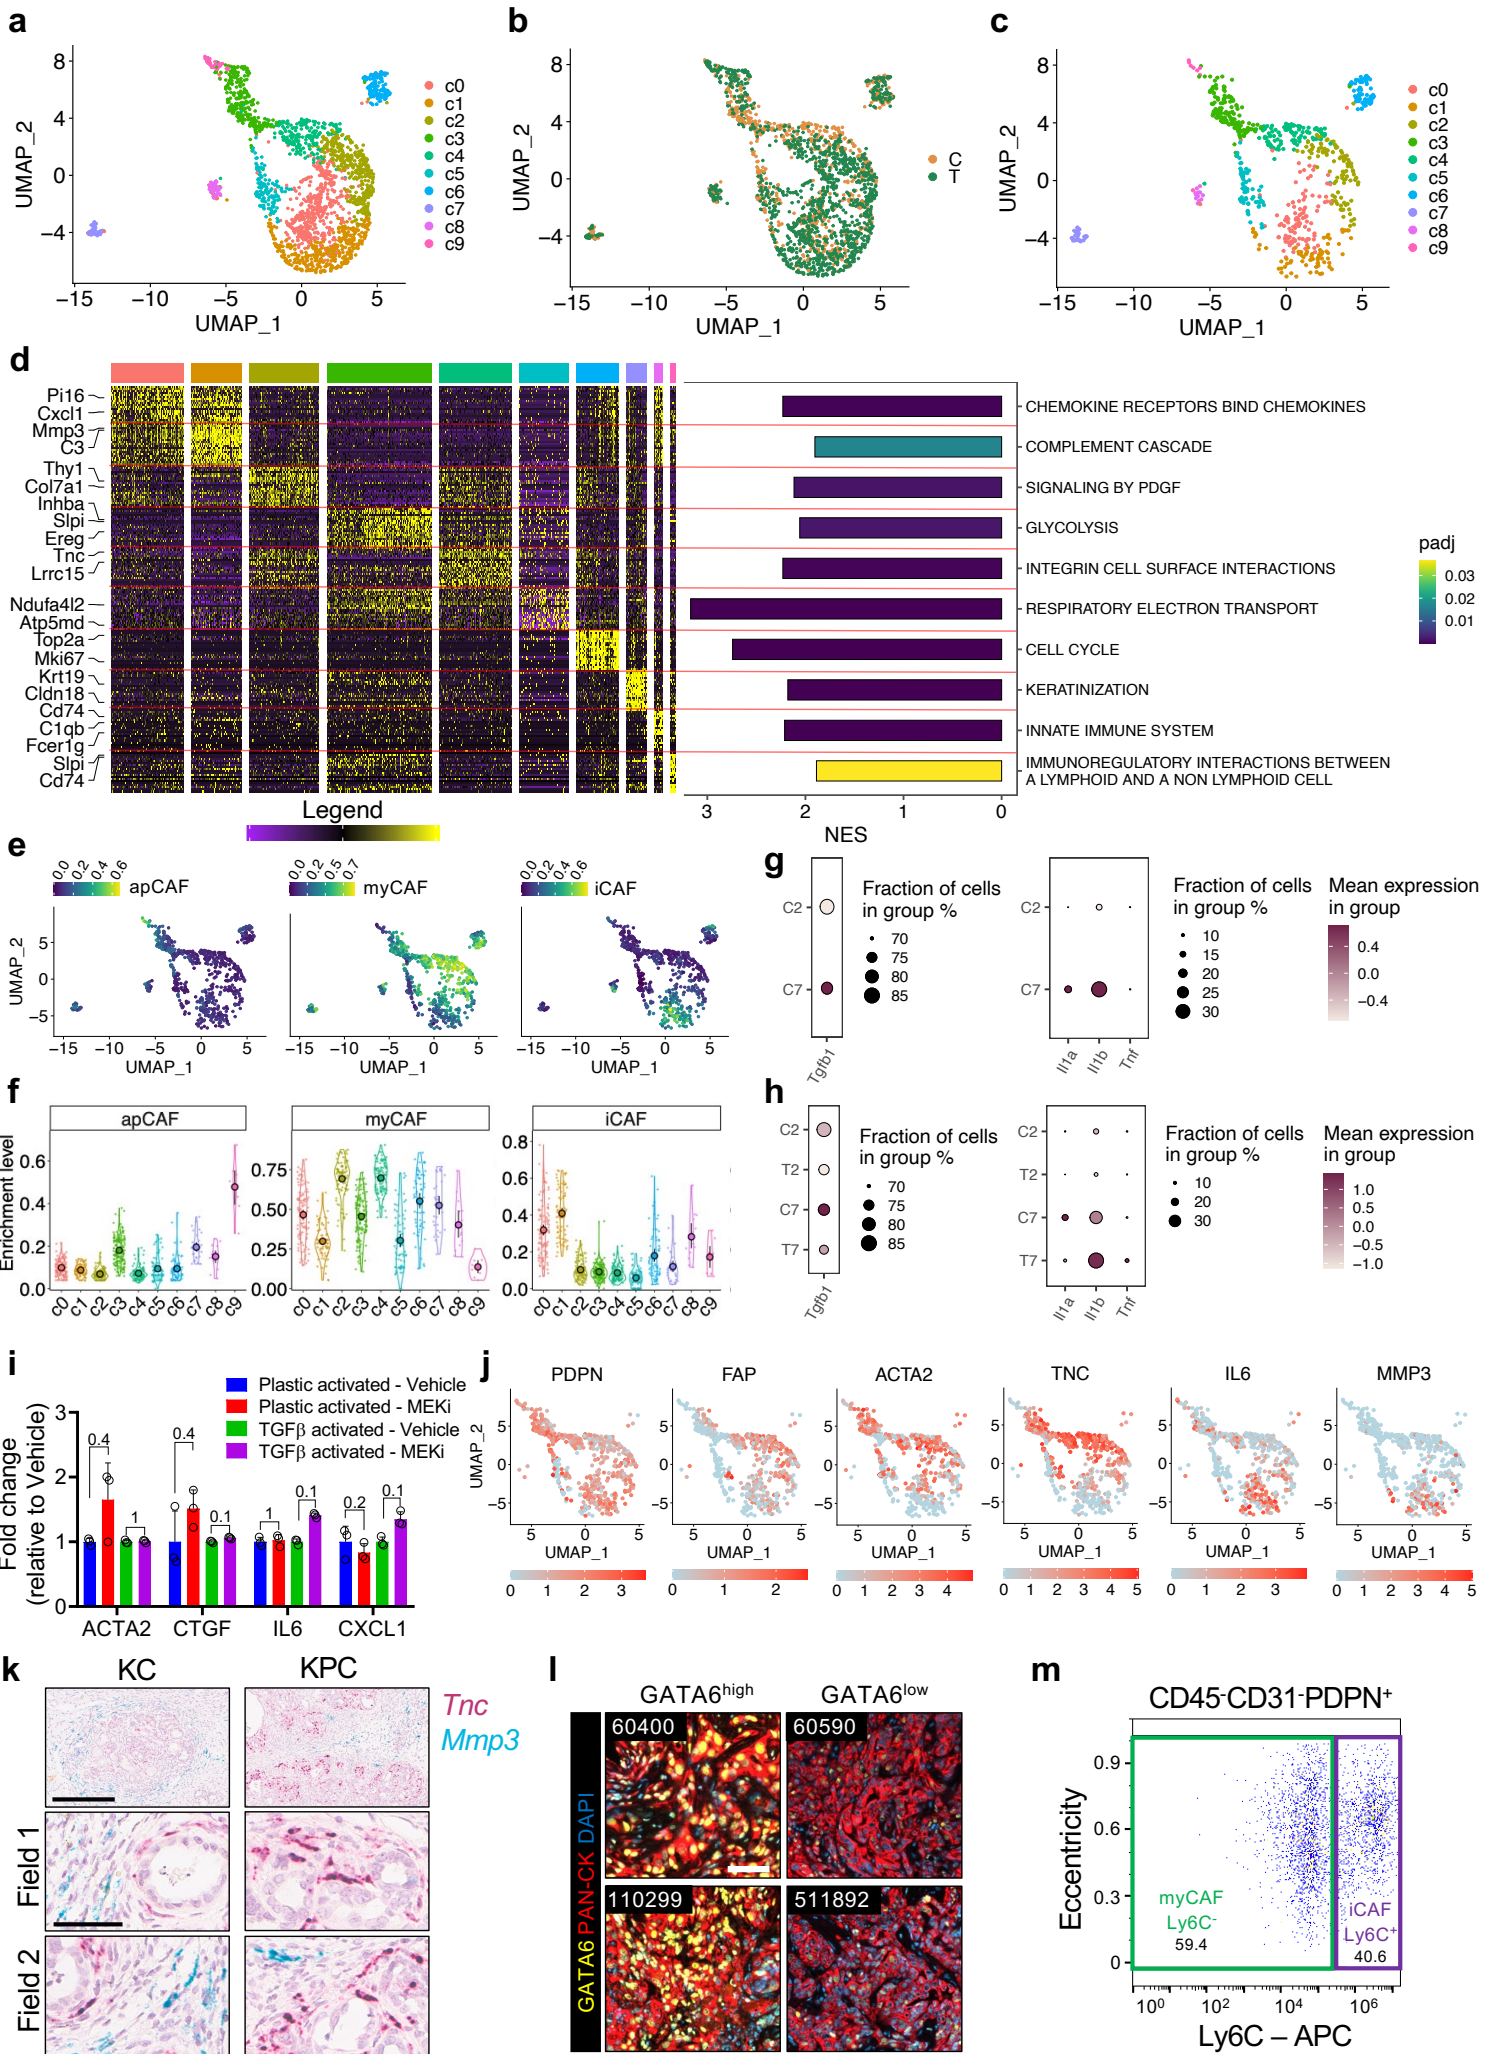

**Supplementary Figure 4: MEKi result into increased iCAFs frequency in mouse PDAC.** **a** UMAP plot of fibroblast subclusters, colour-coded by cell type. **b** UMAP plot of cells from the fibroblast cluster of integrated samples of vehicle- and MEKi-treated mice **c** UMAP plot of fibroblasts from untreated tumour-bearing mice, colour-coded as in a. **d** Heatmap showing the relative average expression of the most enriched genes for each cluster, showing two representative genes per cluster together with pathway enrichment analysis using GSEA<sup>3</sup>. See Supplementary Data 3. **e** Feature plot showing enrichment of mouse apCAF, myCAF, and iCAF signatures<sup>4</sup> in the scRNA-seq dataset. **f** Violin plots showing enrichment of the Elyada's signatures<sup>4</sup> in the clusters from c. Data are presented as mean values and 95% CI. **g** Dot plot of scaled average expression of selected genes in malignant cells from tumour-bearing mice at different progression stages (C2 vs C7). Colour intensity shows expression level; dot size shows the percentage of expressing cells. **h** Dot plot of scaled average expression of selected genes in malignant cells from tumour-bearing mice treated with MEKi for 2 (T2) or 7 (T7) days vs. matched controls (C2, C7). Colour intensity represents expression level, dot size represent the percentage of expressing cells. **i** MEKi treatment induced changes in mRNA expression of myCAF (*Acta2*, *Ctgf*) and iCAF (*Il6*, *Cxcl1*) markers in mouse PSCs activated by either plastic cultivation or TGF- $\beta$ 1. p values determined by Mann Whitney test (two-sided). n = 3 technical replicates. Results presented as mean values  $\pm$  S.D. **j** UMAP plot showing normalized expression of selected markers (*Pdpr*, *Fap*, *Acta2*, *Il6*, *Tnc*, and *Mmp3*) in fibroblast cluster cells from vehicle-treated mice. **k** Representative *in situ* hybridization images showing expression of *Tnc* (myCAFs) and *Mmp3* (iCAFs) in tissues from KC and KPC mice. Scale bar, 300  $\mu$ m (main), 60  $\mu$ m (insets). **l** Representative multiplex immunofluorescence images of murine PDAC tissues from orthotopic transplantation of classical or basal-like murine cell lines. Scale bar, 50  $\mu$ m. **m** Flow plots showing the gating strategy to distinguish myCAFs from iCAFs. See also Fig. 3h.



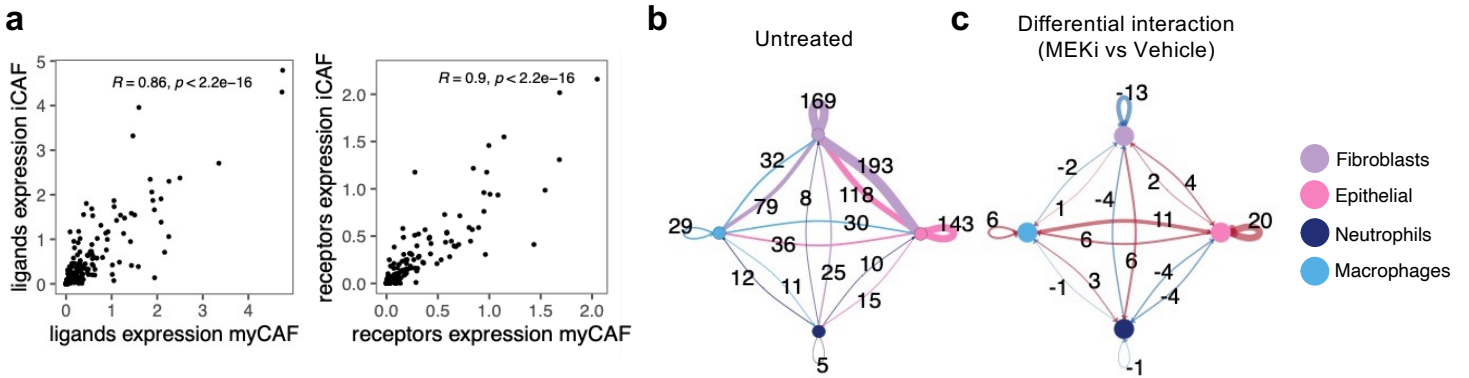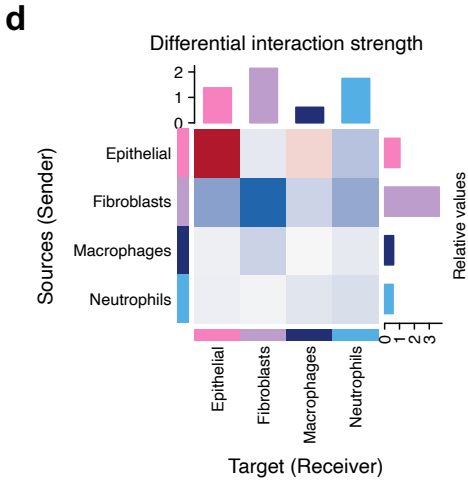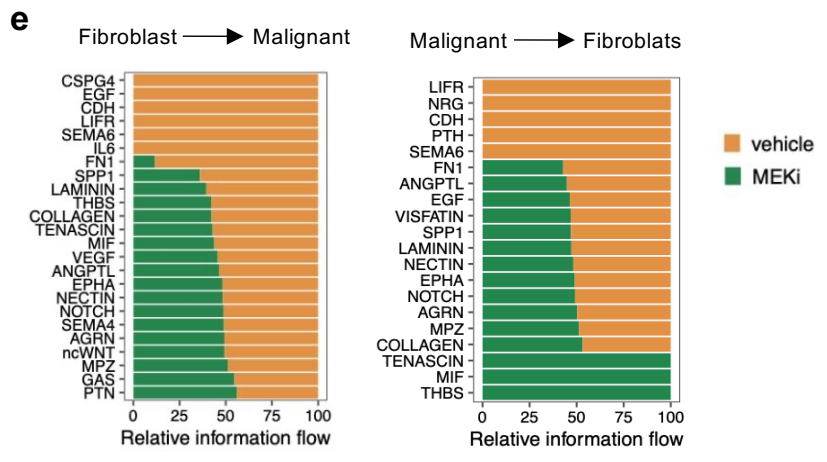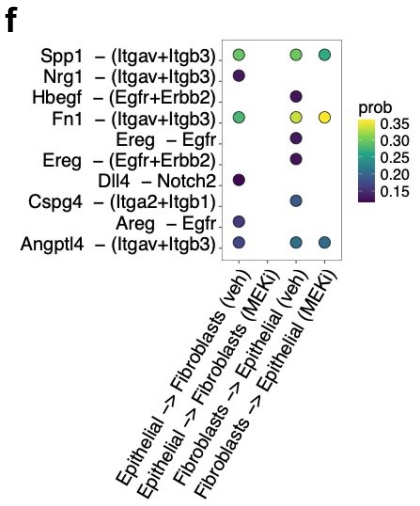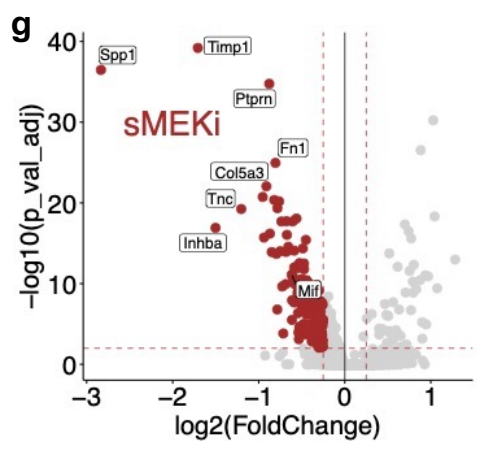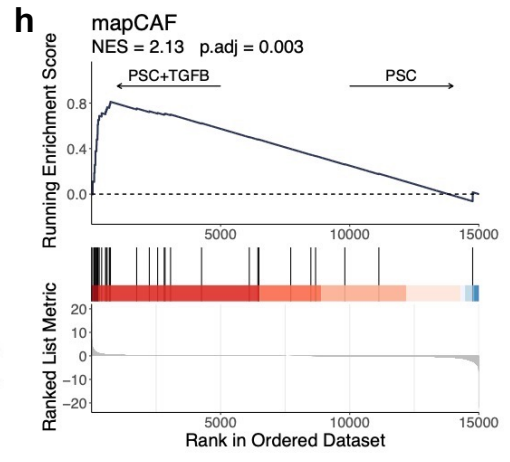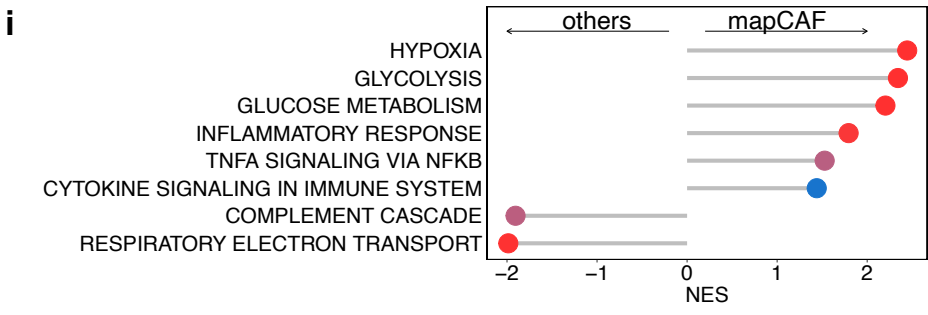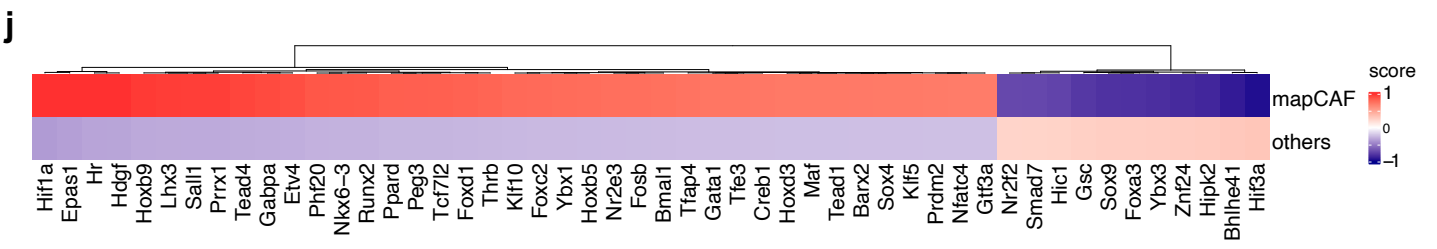

**Supplementary Figure 5: Identification of a gene expression signature of CAFs with elevated MAPK activity.** **a** Pearson correlation of ligand and receptor gene expression between major CAF subtypes. **b** Number of inferred interactions between malignant cells, fibroblasts, macrophages, and neutrophils based on CellChat<sup>5</sup> analysis of scRNA-seq data of untreated tumours. **c** Number of differential connections between the selected cell types in MEKi-treated tumours compared to untreated tumours. **d** Differential interaction strengths inferred between the annotated cell type pairs upon MEKi. The overall change in interaction strengths for a given cell type either as receiver or sender is reported in the barplot at the top and right-hand side of the heatmap, respectively. **e** Stacked barplot showing all the statistically significant ( $p < 0.05$ , paired Wilcoxon test) signalling pathways ranked based on their differences of overall information flow within the inferred networks between treated and untreated tumours. **f** Dot plot showing selected ligand-receptor interactions and their strengths. **g** Volcano plot representing the differentially expressed genes in fibroblasts upon treatment with MEKi for 2 days. The red dots are the genes defining the sMEKi signature ( $n = 169$ ). Highlighted some of the genes with  $\log_2FC$  expression  $< -2$  and adjusted  $p < 0.05$ . **h** GSEA plot showing the enrichment of the mapCAF signature in mPSCs treated with 5 ng/mL of TGF- $\beta$ 1 for 72 hours. **i** Enrichment analysis of significantly up- and down-regulated pathways in mapCAFs. **j** Transcription factor activity inference for the indicated cell subsets using decoupleR<sup>6</sup> on scRNA-seq data.





**Supplementary Figure 6: Identification of a human mapCAF signature.** **a** Density plot showing enrichment of human LRRC15<sup>7</sup>, meCAFs<sup>8</sup>, and the Hypoxia\_Hallmark signatures in the human scRNA-seq dataset. **b** Violin plots showing enrichment of the human LRRC15<sup>7</sup>, meCAFs<sup>8</sup>, and the Hypoxia\_Hallmark signatures in the clusters from Fig. 5a. Data are presented as mean values and 95% CI. **c** Volcano plot representing the differentially expressed genes from the comparison between fibroblasts displaying high vs low MAPK transcriptional activity (based on sMEKi levels). The red dots are some of the genes defining the mapCAF signature (n = 22). **d** Average expression of genes of the extended mapCAF signature (n = 46) in the malignant compartment of the scRNA-seq dataset from Peng et al.<sup>9</sup>. Genes included in the final version of the mapCAF signature are coloured in red. **e** UMAP plot showing cell type annotation of the scRNA-seq dataset from Peng et al.<sup>9</sup>. **f** UMAP plots of cells from Peng et al.<sup>9</sup>. coloured by gene expression of the indicated genes. **g** Samples from the harmonized scRNA-seq dataset<sup>9-12</sup> ranked from left to right based on the proportion of basal-like or classical cells. **h** Scatter plots showing the enrichment of the Hallmark\_Glycolysis signature in the malignant compartment of PDAC cases with prevalence of basal-like cells from g. p values as determined by Wilcoxon after aggregating basal-like and classical tumours.

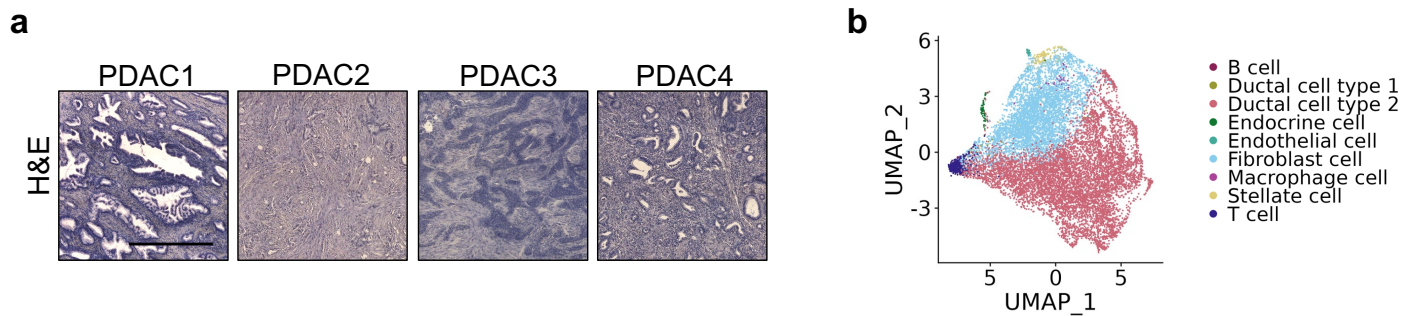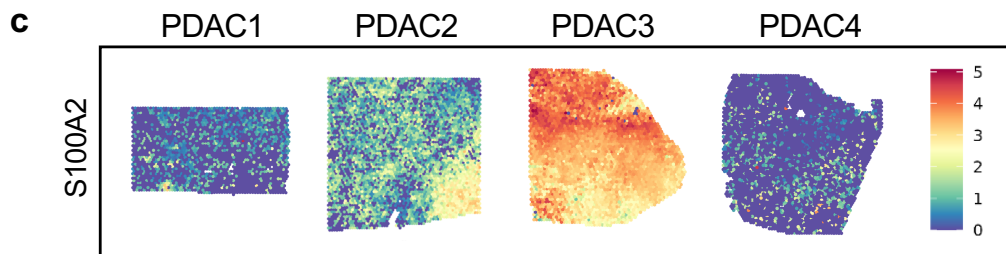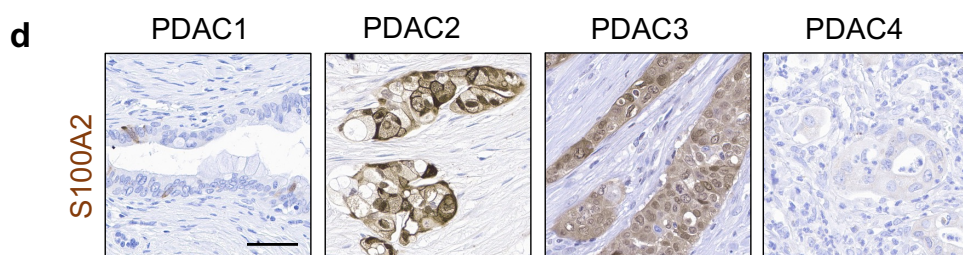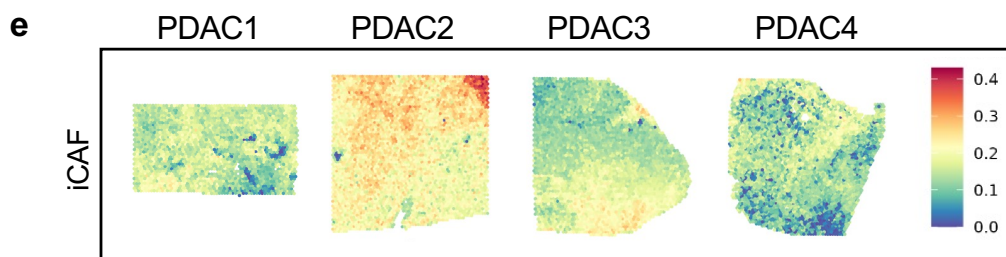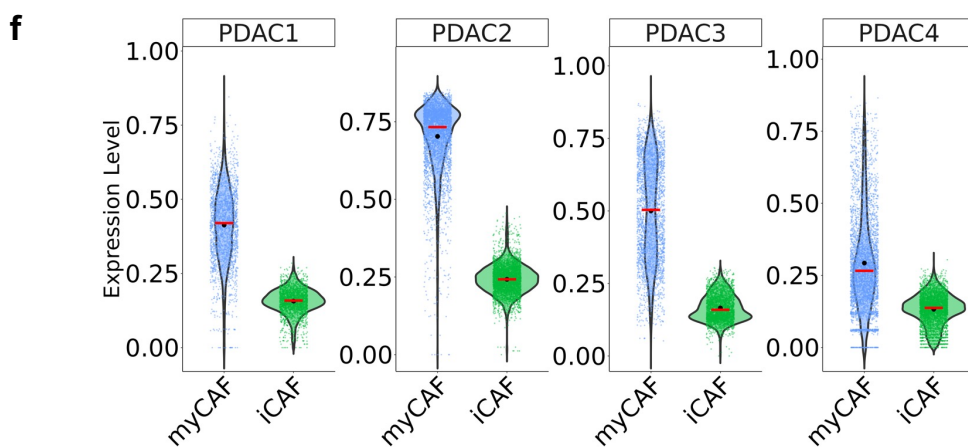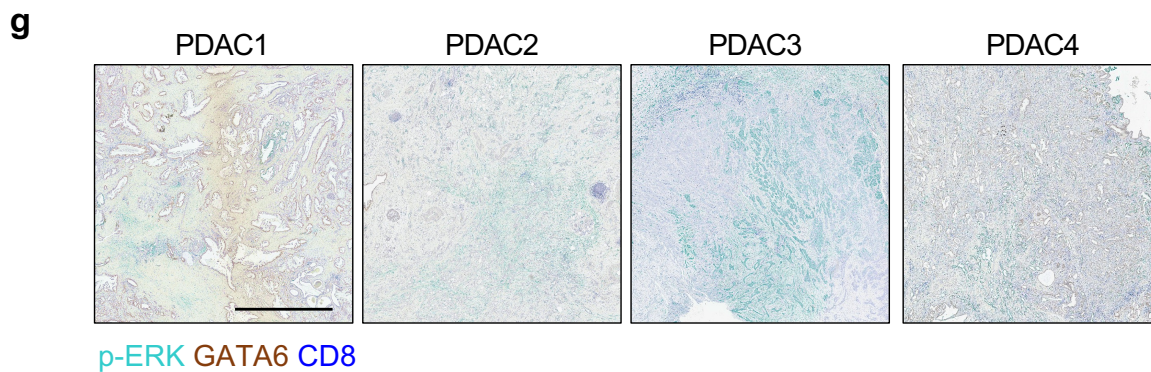

**Supplementary Figure 7. Spatial transcriptomics of human PDAC tissues.** **a** Haematoxylin and Eosin staining of 4 PDAC primary tumours selected for spatial transcriptomics (ST). Scale bar, 1 mm. **b** UMAP plot showing the 9 clusters annotated using on scRNA-seq data from Peng et al.<sup>9</sup> **c** Spatial visualization of S100A2 expression. **d** Immunohistochemical expression of the basal-like marker S100A2 in serial sections of the 4 PDAC tumour tissues subjected to ST. Scale bar, 50  $\mu$ m. **e** Spatial visualization of the gene module score for the iCAF signature<sup>4</sup> in each section. **f**. Distribution of the gene module scores for the myCAF and the iCAF programs<sup>4</sup> in each section. p values as determined by Wilcoxon test. **g** Low magnification images of the multiplex IHC (p-ERK, GATA6, and CD8) on the four PDAC tumour tissues. Scale bar, 2 mm.

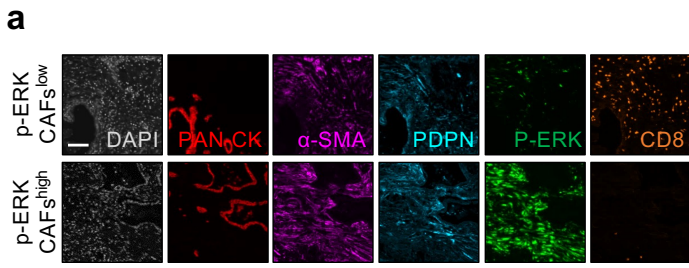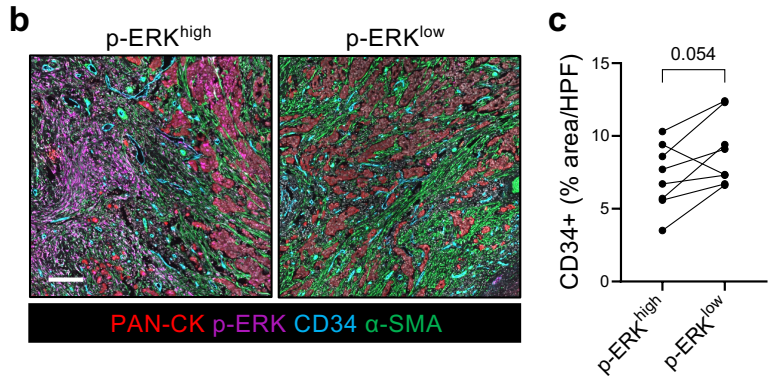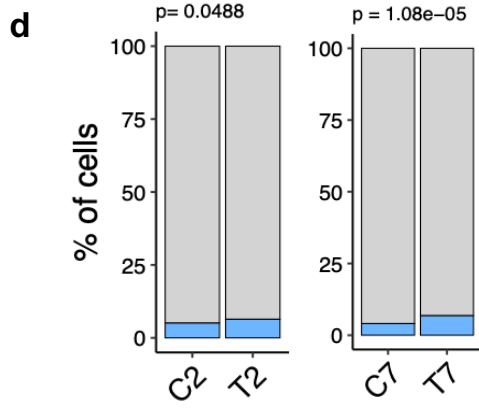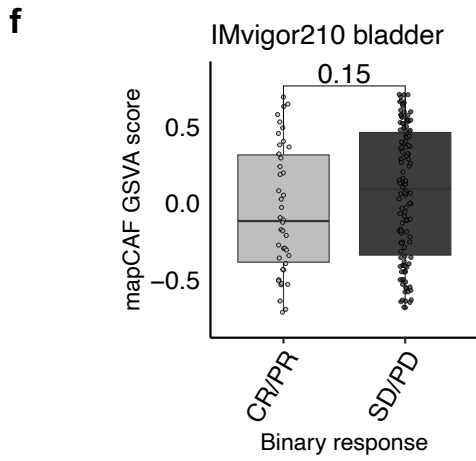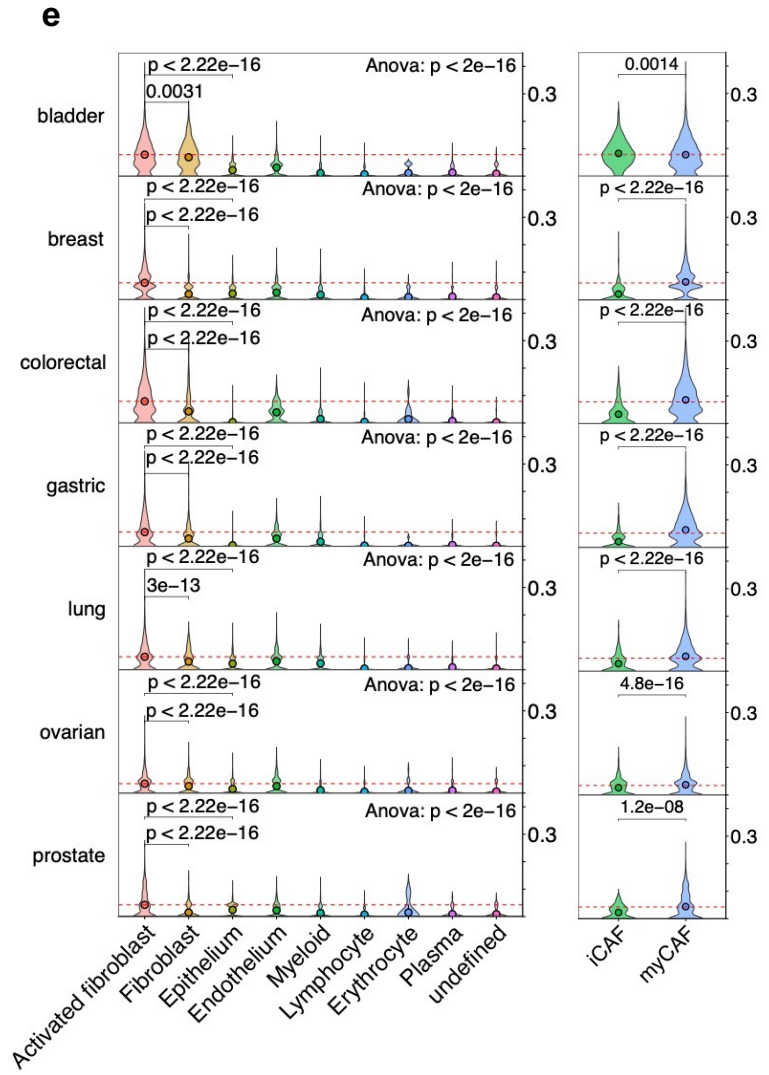

**Supplementary Figure 8. The mapCAF phenotype is associated with T cell depleted tumour areas.** **a** Representative areas from Fig. 7a showing individual fluorescence channels. Scale bar, 100  $\mu\text{m}$ . **b** Representative images of multiplex IF performed on FFPE of human PDAC tissues ( $n = 8$  tissues). The two panels represent different areas within the same tumour displaying either high or low density of p-ERK<sup>+</sup> CAFs. Scale bar, 200  $\mu\text{m}$ . **c** Paired dot plot showing the quantification of the percentage of CD34<sup>+</sup> cells in p-ERK<sup>+</sup> and p-ERK<sup>-</sup> areas from the same tumour. p values as determined by paired t test (two-sided). **d** Barplot displaying the percentage of T cells (relative to the others non-epithelial populations) from mice treated with either vehicle (C) or MEKi (T) for 2 or 7 days. p values as determined by  $\chi^2$  test (two-sided). **e** Violin plots representing the score values for mapCAF signature of cells from different cell type in 7 cancer types from the Luo et al. dataset<sup>13</sup>. Variation of mapCAF signature among all cell types annotated by Anova. Pair-wise comparison between activated fibroblasts and fibroblasts, and between activated fibroblasts and epithelial cells is annotated by Wilcoxon test (two-sided). Comparison between myCAFs and iCAFs on the right is annotated by Wilcoxon test (two-sided) **f** Boxplots showing mapCAF GSVA score in bladder cancers from the IMvig210 study<sup>14</sup>. Samples ( $n = 168$ ) are separated by binary drug response. CR, complete response; PR, partial response; SD, stable disease; PD, progressive disease. p values as determined by Wilcoxon test (two-sided). CR/PR: Min -0.71, Max 0.70, Med -0.11, Q1 -0.39, Q3 0.32, IQR 0.70, LW -0.71, UW 0.70. SD/PD: Min -0.70, Max 0.72, Med 0.09, Q1 -0.34, Q3 0.47, IQR 0.81, LW -0.69, UW 0.72.

## Supplementary References

- 1 Moffitt, R. A. *et al.* Virtual microdissection identifies distinct tumor- and stroma-specific subtypes of pancreatic ductal adenocarcinoma. *Nat Genet* **47**, 1168-1178 (2015).
- 2 Cancer Genome Atlas Research Network. Electronic address, a. a. d. h. e. & Cancer Genome Atlas Research, N. Integrated Genomic Characterization of Pancreatic Ductal Adenocarcinoma. *Cancer Cell* **32**, 185-203 e113 (2017).
- 3 Subramanian, A. *et al.* Gene set enrichment analysis: a knowledge-based approach for interpreting genome-wide expression profiles. *Proc Natl Acad Sci U S A* **102**, 15545-15550 (2005).
- 4 Elyada, E. *et al.* Cross-Species Single-Cell Analysis of Pancreatic Ductal Adenocarcinoma Reveals Antigen-Presenting Cancer-Associated Fibroblasts. *Cancer Discov* **9**, 1102-1123 (2019).
- 5 Jin, S. *et al.* Inference and analysis of cell-cell communication using CellChat. *Nat Commun* **12**, 1088 (2021).
- 6 Garcia-Alonso, L., Holland, C. H., Ibrahim, M. M., Turei, D. & Saez-Rodriguez, J. Benchmark and integration of resources for the estimation of human transcription factor activities. *Genome Res* **29**, 1363-1375 (2019).
- 7 Dominguez, C. X. *et al.* Single-Cell RNA Sequencing Reveals Stromal Evolution into LRRC15(+) Myfibroblasts as a Determinant of Patient Response to Cancer Immunotherapy. *Cancer Discov* **10**, 232-253 (2020).
- 8 Wang, Y. *et al.* Single-cell analysis of pancreatic ductal adenocarcinoma identifies a novel fibroblast subtype associated with poor prognosis but better immunotherapy response. *Cell Discov* **7**, 36 (2021).
- 9 Peng, J. *et al.* Single-cell RNA-seq highlights intra-tumoral heterogeneity and malignant progression in pancreatic ductal adenocarcinoma. *Cell Res* **29**, 725-738 (2019).
- 10 Chan-Seng-Yue, M. *et al.* Transcription phenotypes of pancreatic cancer are driven by genomic events during tumor evolution. *Nat Genet* **52**, 231-240 (2020).
- 11 Steele, N. G. *et al.* Multimodal Mapping of the Tumor and Peripheral Blood Immune Landscape in Human Pancreatic Cancer. *Nat Cancer* **1**, 1097-1112 (2020).
- 12 Lin, W. *et al.* Single-cell transcriptome analysis of tumor and stromal compartments of pancreatic ductal adenocarcinoma primary tumors and metastatic lesions. *Genome Med* **12**, 80 (2020).
- 13 Luo, H. *et al.* Pan-cancer single-cell analysis reveals the heterogeneity and plasticity of cancer-associated fibroblasts in the tumor microenvironment. *Nat Commun* **13**, 6619 (2022).
- 14 Rosenberg, J. E. *et al.* Atezolizumab in patients with locally advanced and metastatic urothelial carcinoma who have progressed following treatment with platinum-based chemotherapy: a single-arm, multicentre, phase 2 trial. *Lancet* **387**, 1909-1920 (2016).



Supplementary Fig 1a

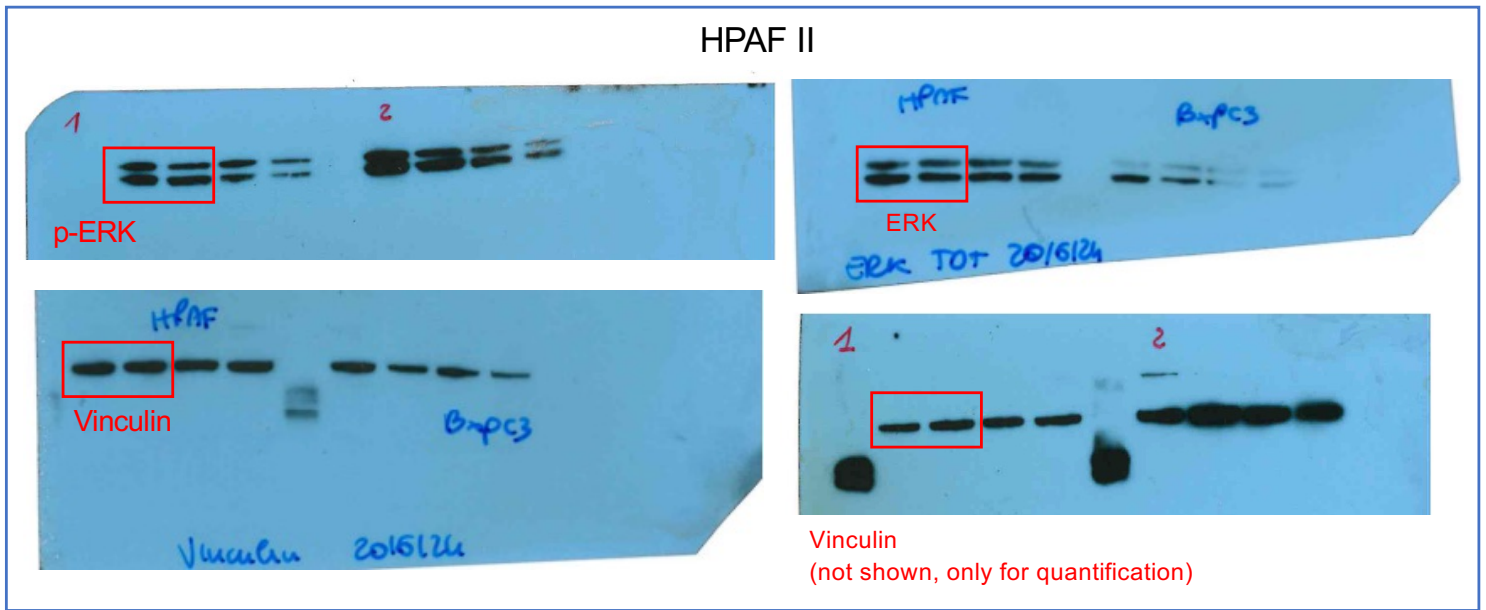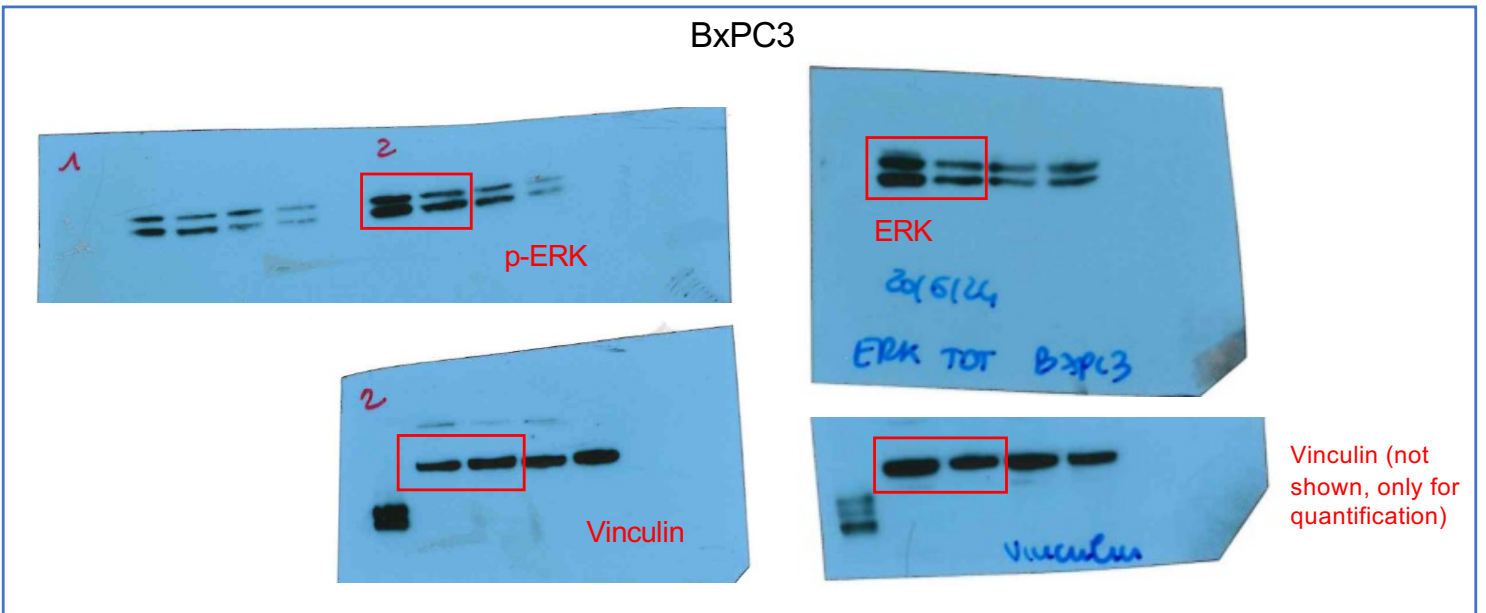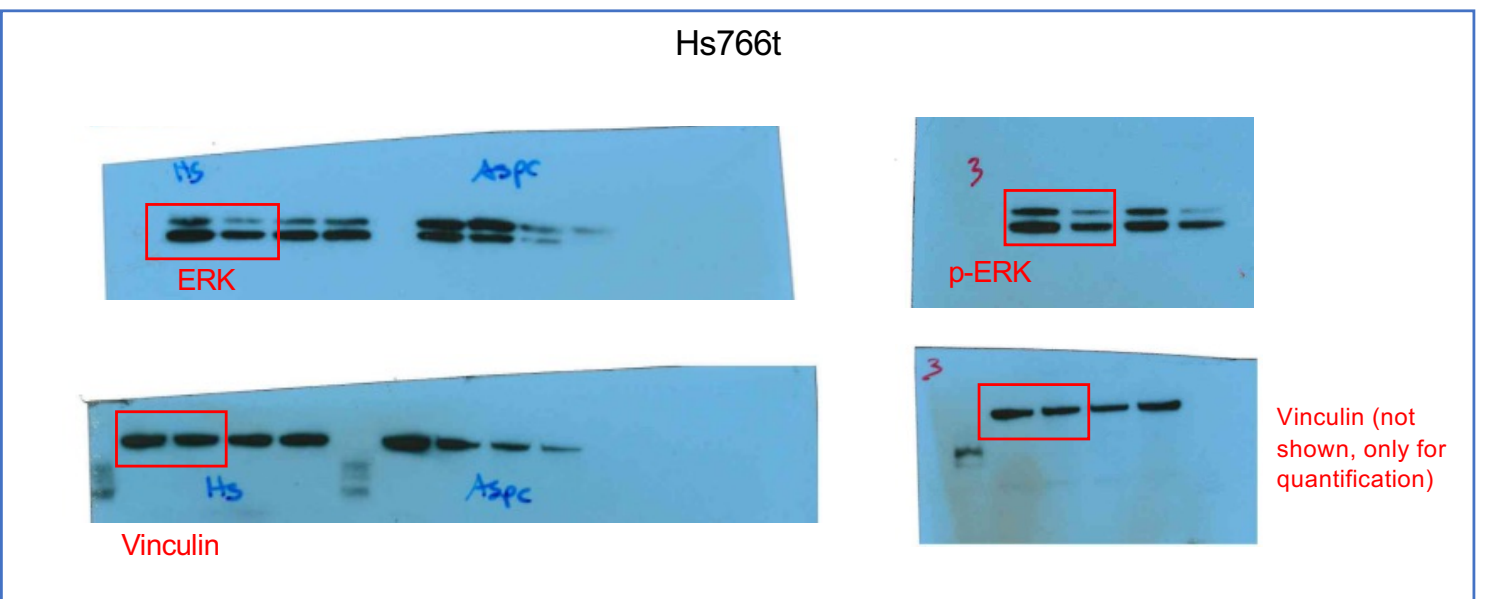

p-ERK: 1:2000 Cell signaling technology #9101

ERK: 1:1000 Cell signaling technology #9102

Vinculin: 1:1000 Cell signaling technology #4650

Supplementary Fig 1a

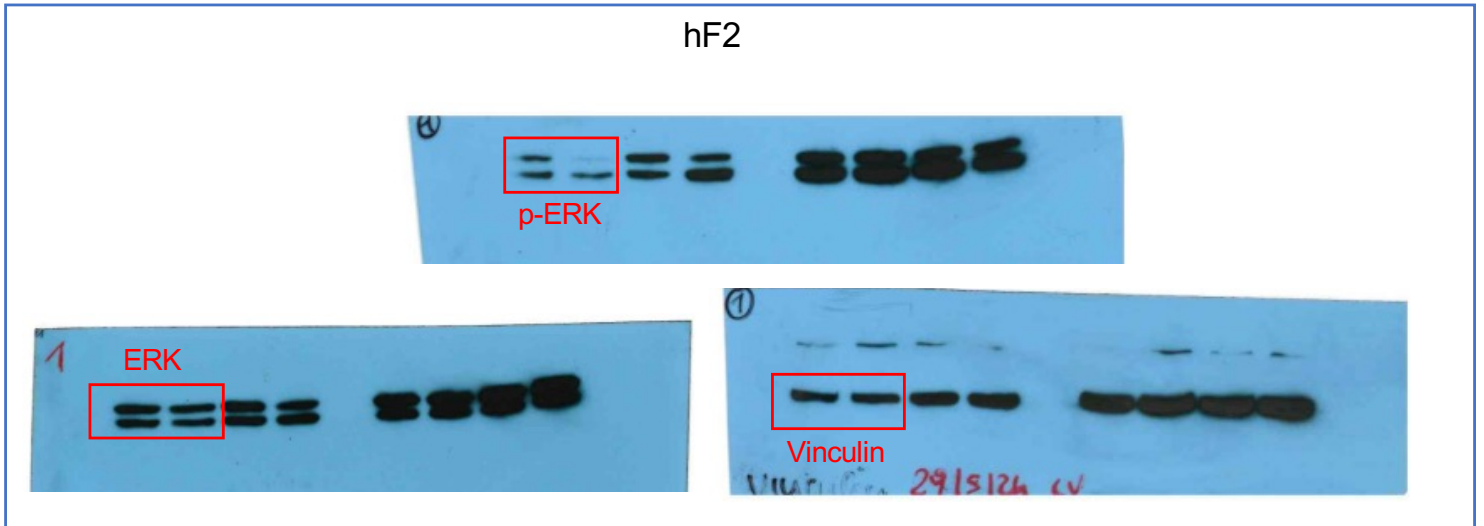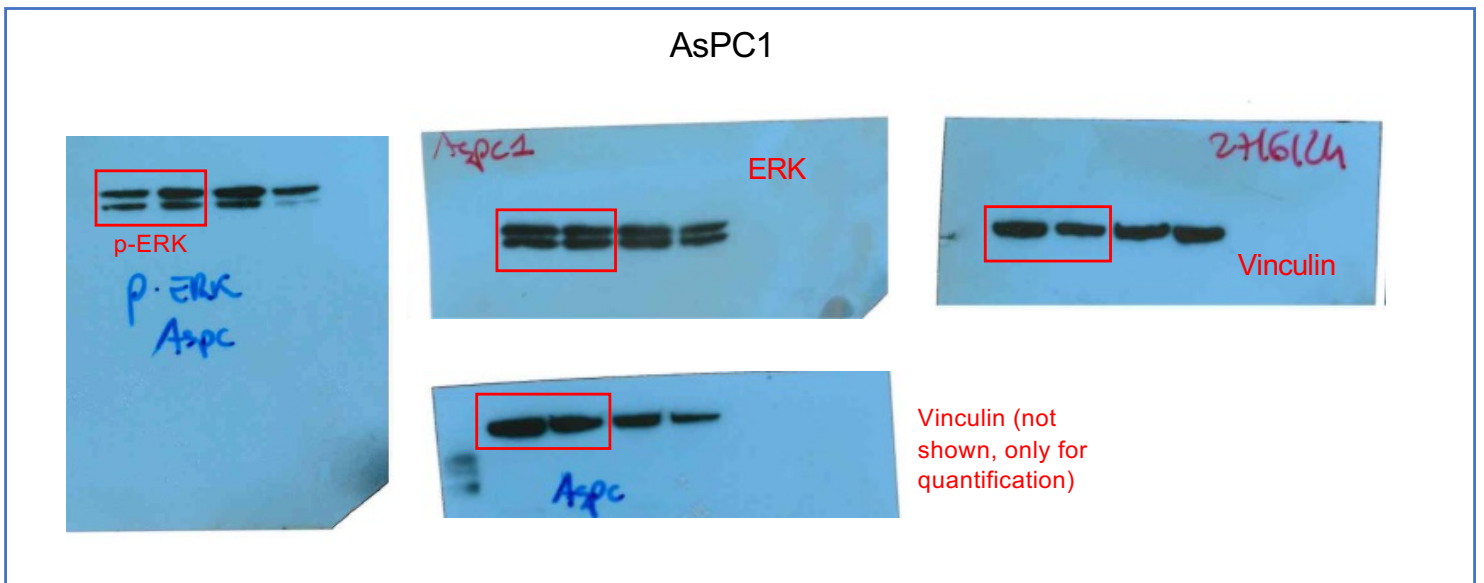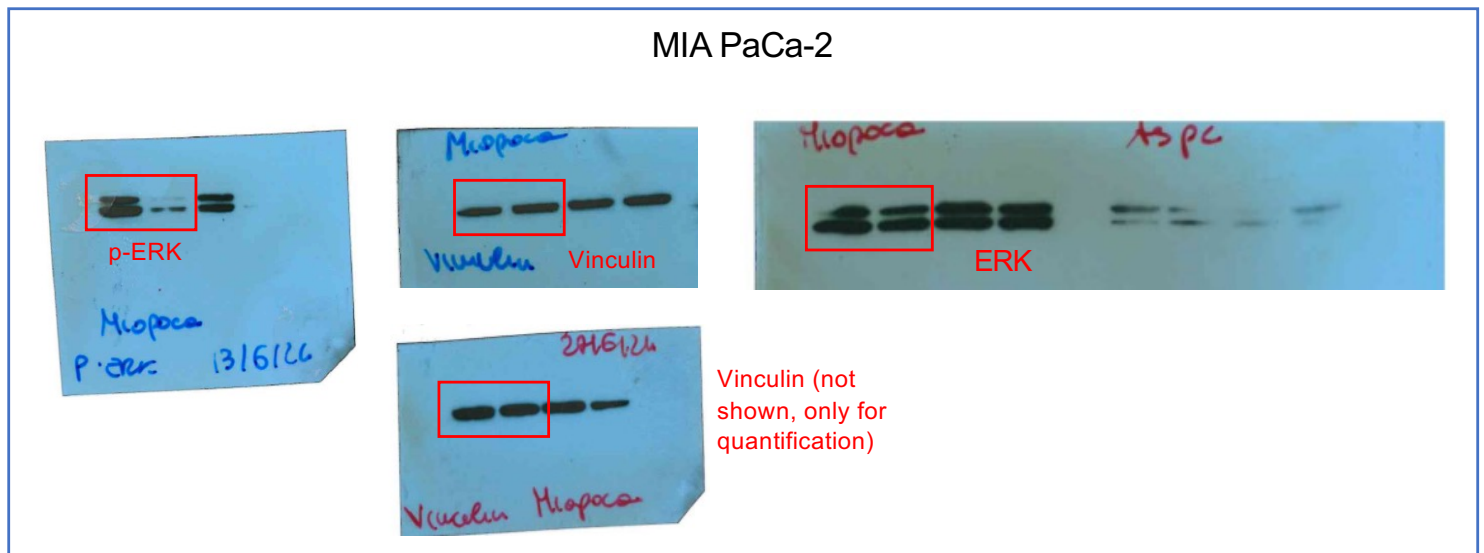

p-ERK: 1:2000 Cell signaling technology #9101

ERK: 1:1000 Cell signaling technology #9102

Vinculin: 1:1000 Cell signaling technology #4650



Supplementary Fig 1a

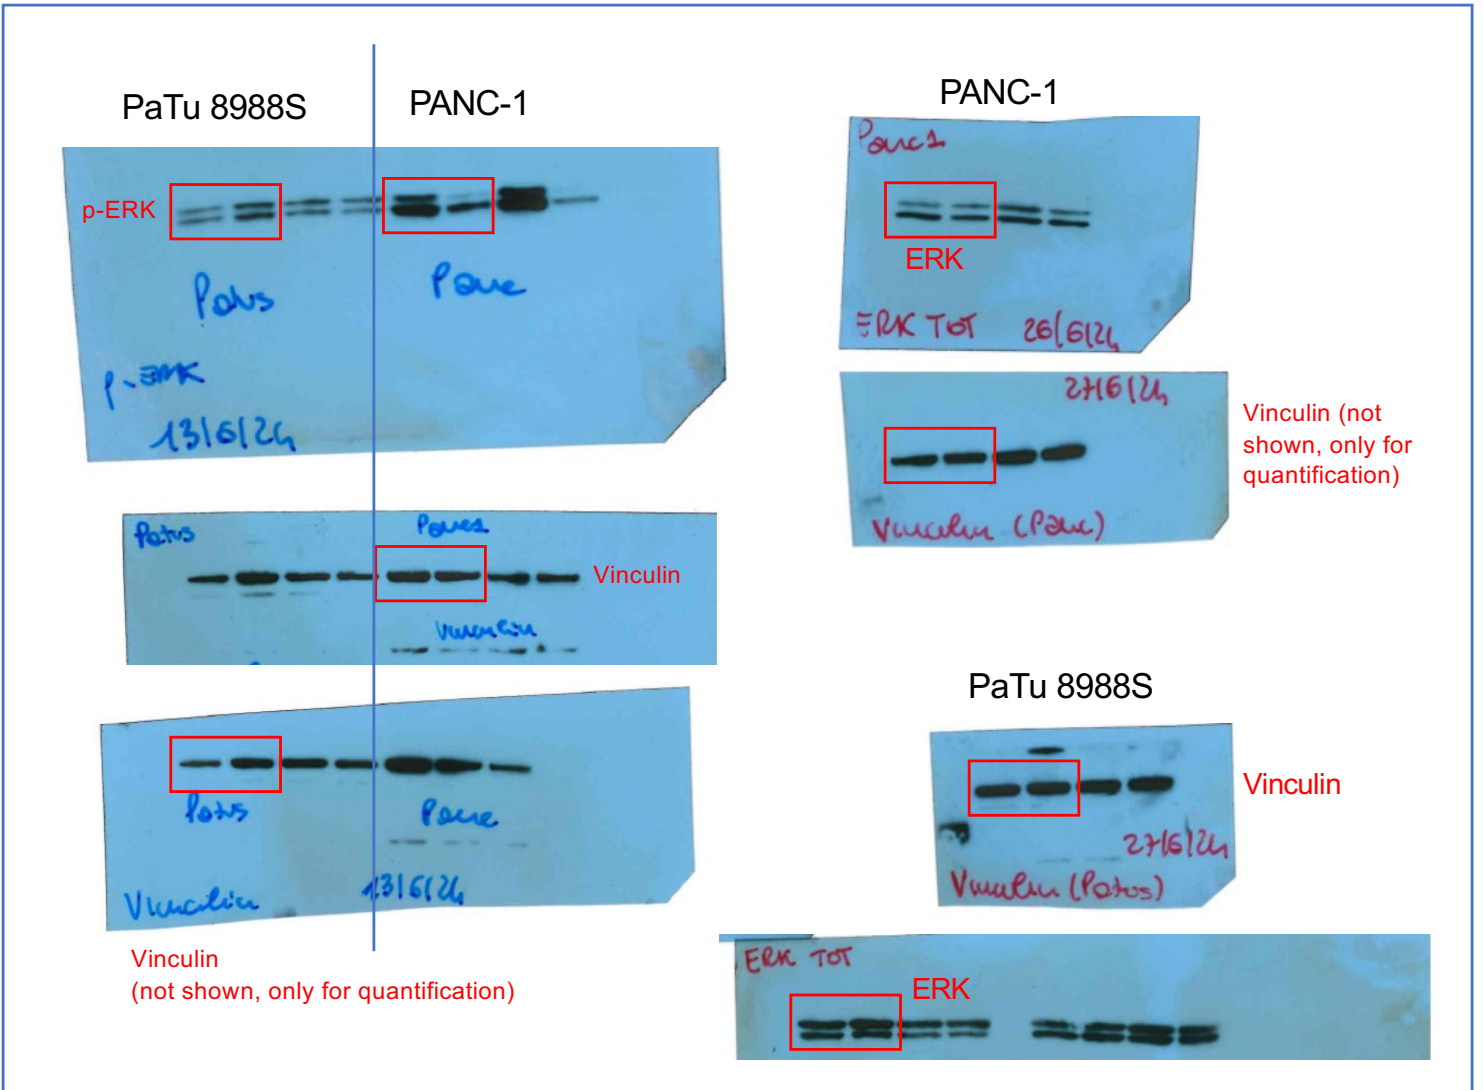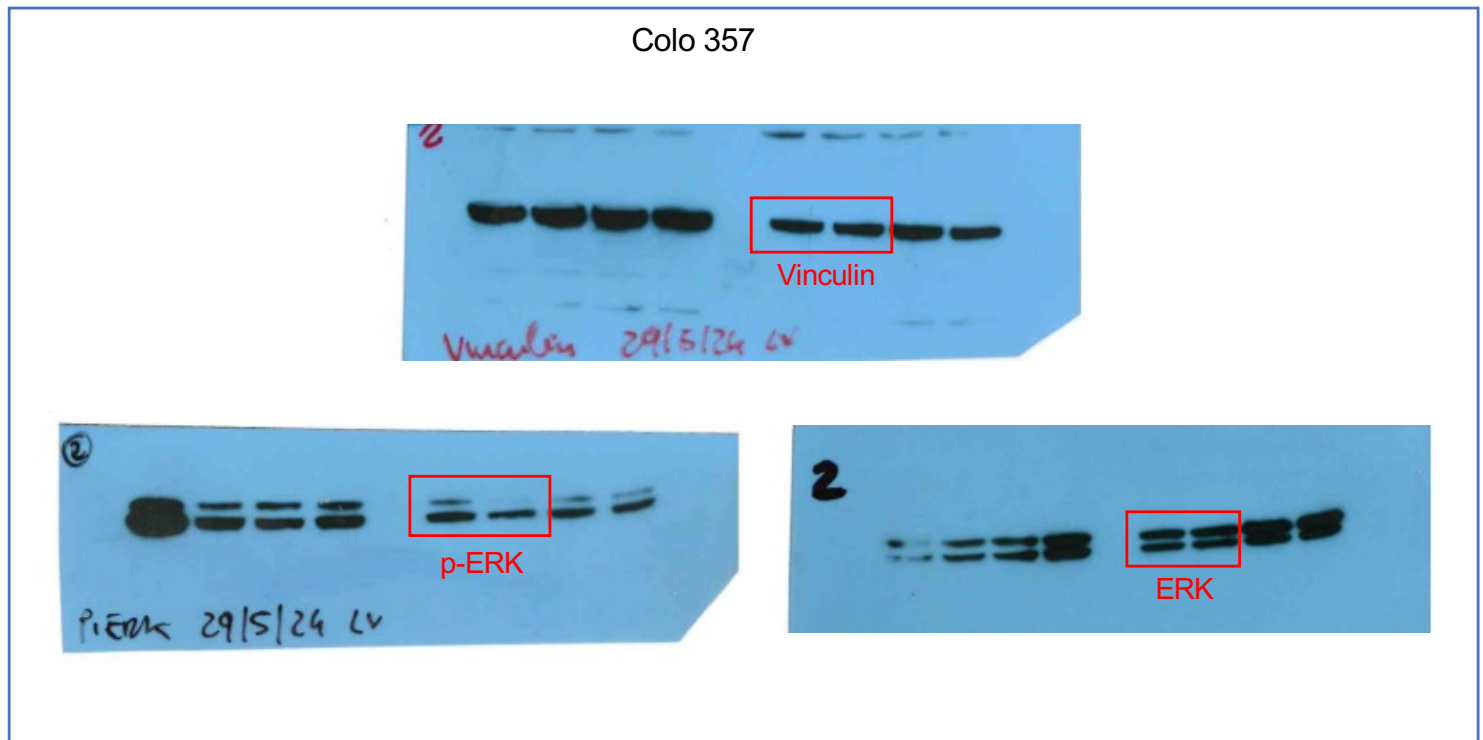

p-ERK: 1:2000 Cell signaling technology #9101

ERK: 1:1000 Cell signaling technology #9102

Vinculin: 1:1000 Cell signaling technology #4650

Supplementary Fig 1a

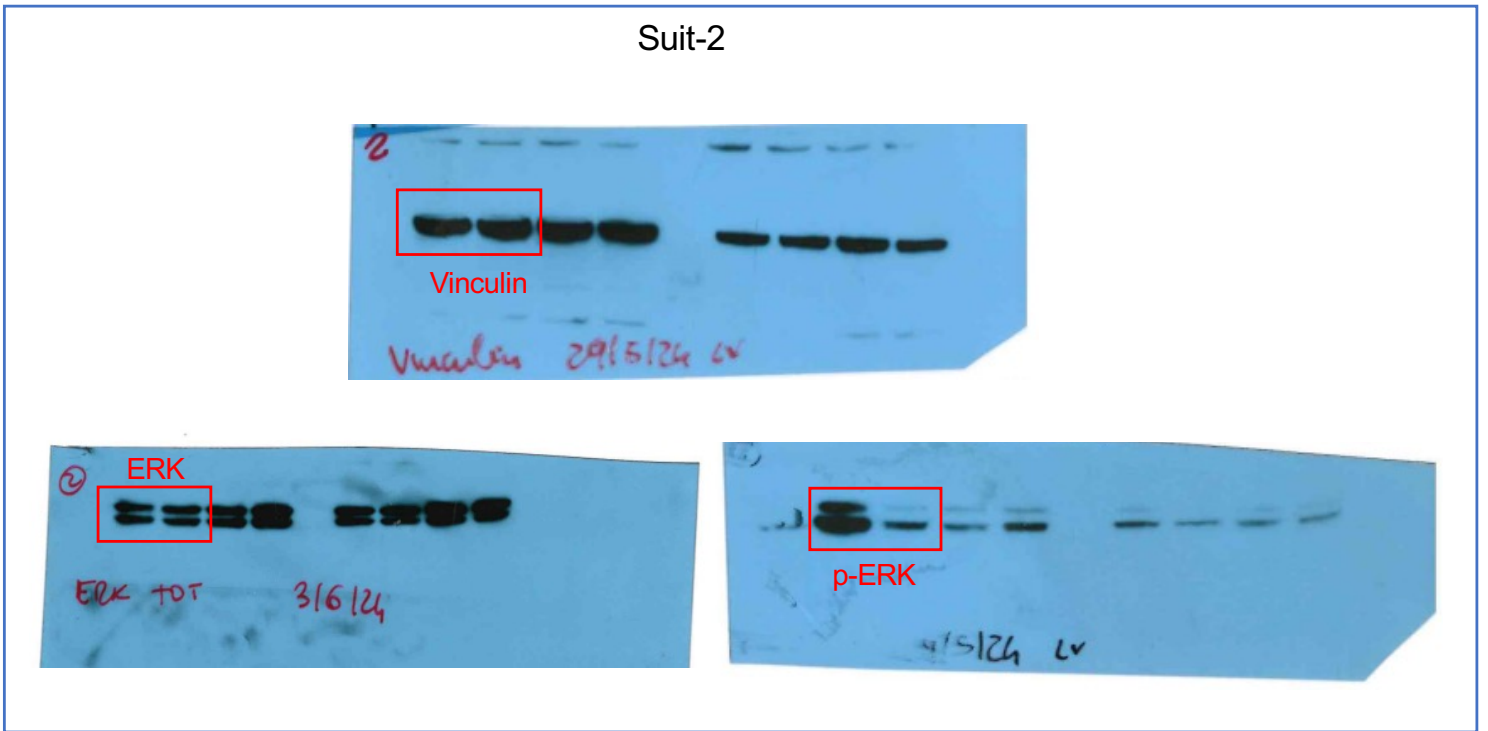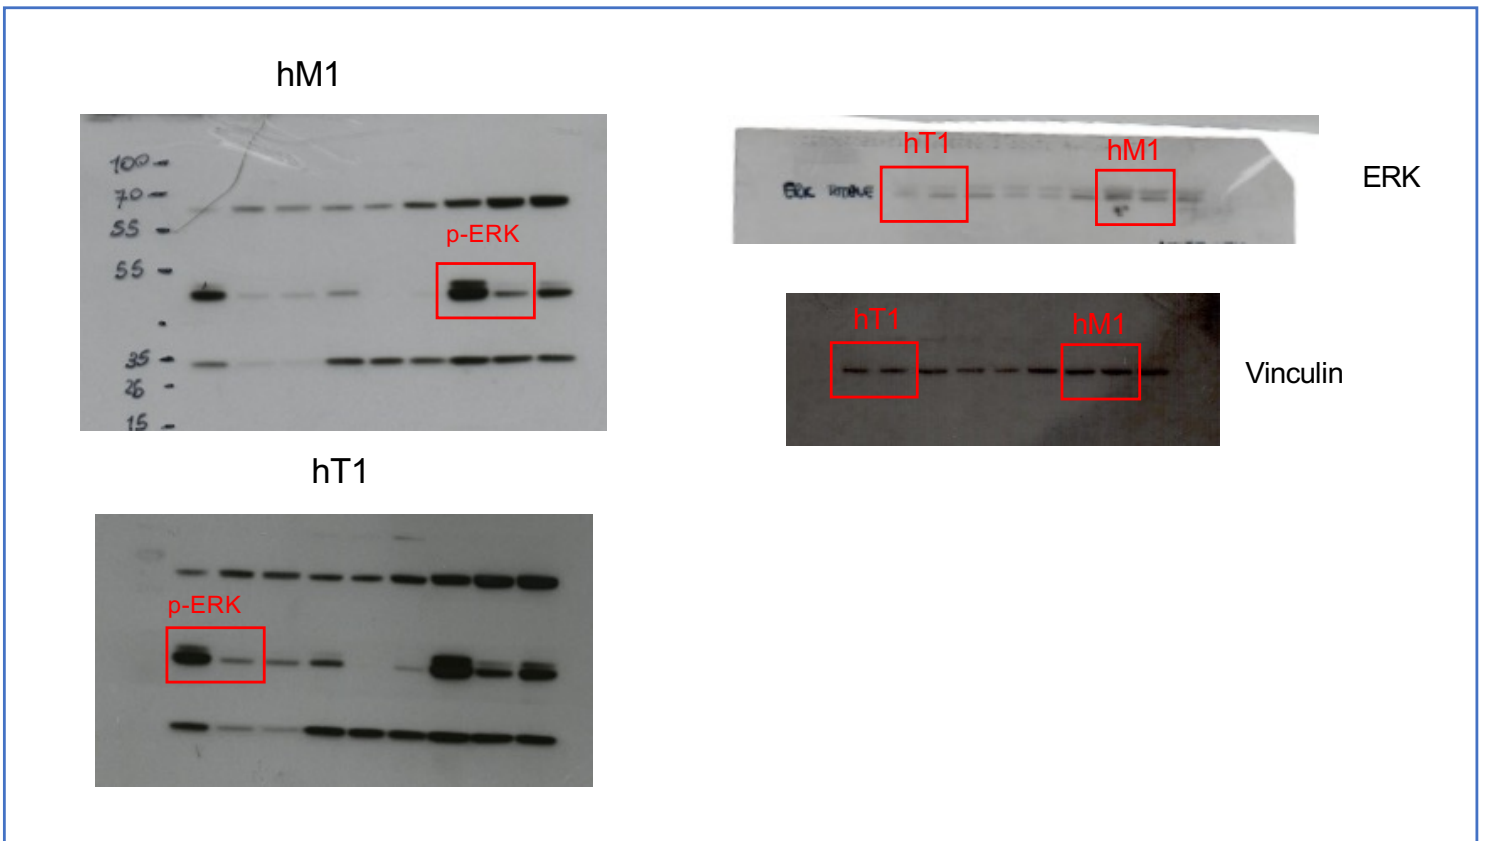

p-ERK: 1:2000 Cell signaling technology #9101

ERK: 1:1000 Cell signaling technology #9102

Vinculin: 1:1000 Cell signaling technology #4650

Supplementary Fig 1h

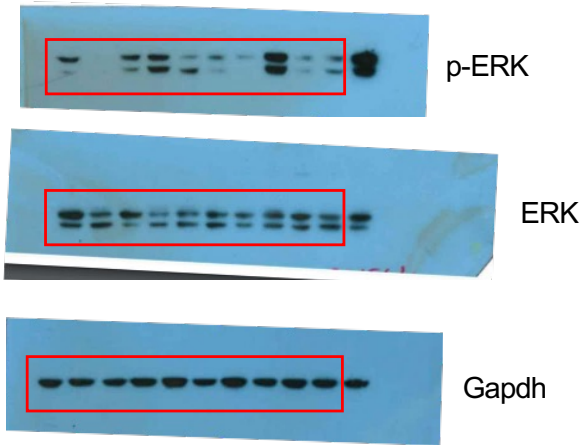

Supplementary Fig 1m

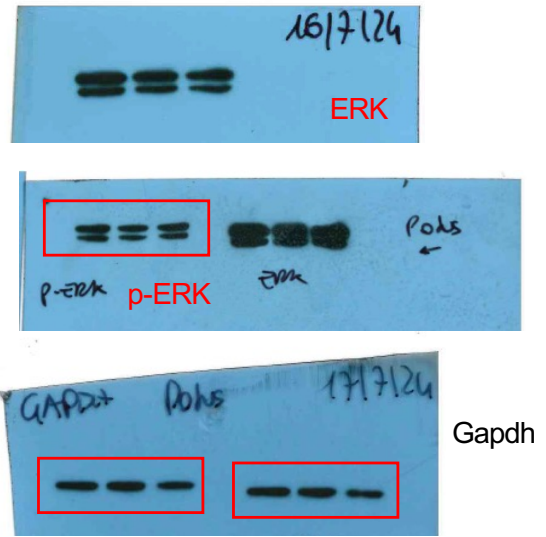

not shown, only for quantification

p-ERK: 1:2000 Cell signaling technology #9101

ERK: 1:1000 Cell signaling technology #9102

Gapdh: 1:3000 Cell signaling technology #5174

### Supplementary Fig 3a

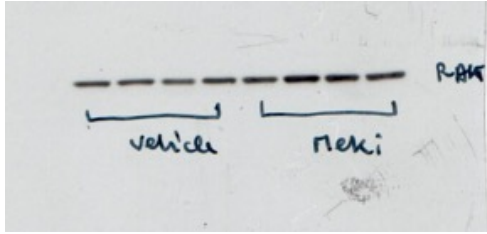

p-AKT: Cell signaling technology #4060

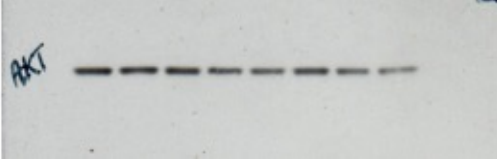

AKT: Cell signaling technology #9272

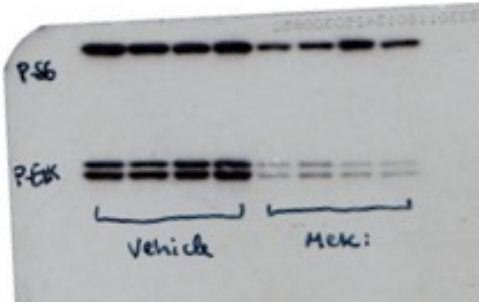

p-S6: Cell signaling technology #D57.2.2E/4858

p-ERK: Cell signaling technology #9101

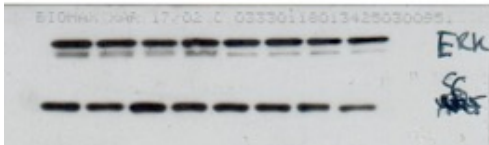

ERK: Cell signaling technology #9102

S6: Cell signaling technology #54D2

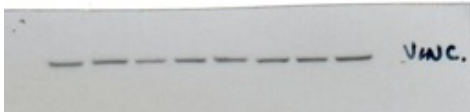

Vinculin: Cell signaling technology #4650

### Supplementary Fig 3d

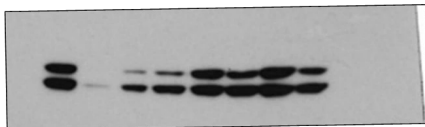

p-ERK: Cell signaling technology #9101

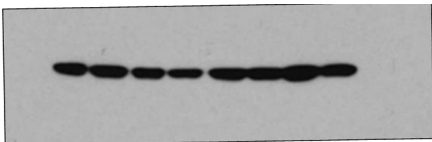

Gapdh: Cell signaling technology #5174
