# Supplementary material for: Differential activity of MAPK signalling defines fibroblast subtypes in pancreatic cancer
Source: PubMed Central journal article supplement — Nat Commun. 2024 Dec 3;15:10534. doi: 10.1038/s41467-024-54975-8 (PMC11615044; doi:10.1038/s41467-024-54975-8), 2024-12-03
Supplement: 41467_2024_54975_MOESM2_ESM.pdf [file 41467_2024_54975_MOESM2_ESM.pdf]

## **Description of Additional Supplementary Files**

Supplementary Data 1: DGE on cell lines

A: Results of DGE between cell lines untreated and treated with MEKi for 2 days

B: Genes of the eMEKi signature

Supplementary Data 2: Cell lines subtyping

A: Subtyping classification, according to Moffitt's classification, of CCLE and in house cell lines

B: Subtyping classification, according to Moffitt's classification, of In house cell lines, vehicle and MEKi treated

C: Subtyping classification, according to Moffitt's classification, of PanCuRx samples

D: Subtyping classification, according to Moffitt's classification, of ICGC samples

E: Subtyping classification, according to Moffitt's classification, of TCGA samples

Supplementary Data 3: Annotation of mouse fibroblast clusters

A: Differential Gene expression and Enrichment analysis for cluster 0

B: Differential Gene expression and Enrichment analysis for cluster 1

C: Differential Gene expression and Enrichment analysis for cluster 2

D: Differential Gene expression and Enrichment analysis for cluster 3

E: Differential Gene expression and Enrichment analysis for cluster 4

F: Differential Gene expression and Enrichment analysis for cluster 5

G: Differential Gene expression and Enrichment analysis for cluster 6

H: Differential Gene expression and Enrichment analysis for cluster 7

I: Differential Gene expression and Enrichment analysis for cluster 8

L: Differential Gene expression and Enrichment analysis for cluster 9

Supplementary Data 4: Ligand-receptor analysis

A: Ligand-receptor pair data between Epithelial -> Fibroblasts in vehicle and MEKi

B: Ligand-receptor pair data between Fibroblast -> Epithelial cells in vehicle and MEKi

Supplementary Data 5: DGE on fibroblasts cluster from in house sc-RNAseq

A: Results of DGE between cells of the fibroblast cluster from sc-RNAseq data of mice treated either with vehicle or MEKi for 2 days

B: Genes of the sMEKi signature

C: Results of DGE between mapCAFs and other cells of the fibroblast cluster from sc-RNAseq data of vehicle-treated mice

D: Genes of the mouse mapCAF signature

Supplementary Data 6: Annotation of human fibroblast clusters

A: Differential Gene expression and Enrichment analysis ( $p_{adj} < 0.05$ ) for cluster 0

B: Differential Gene expression and Enrichment analysis ( $p_{adj} < 0.05$ ) for cluster 1

C: Differential Gene expression and Enrichment analysis ( $p_{adj} < 0.05$ ) for cluster 2

D: Differential Gene expression and Enrichment analysis ( $p_{adj} < 0.05$ ) for cluster 3

E: Differential Gene expression and Enrichment analysis ( $p_{adj} < 0.05$ ) for cluster 4

F: Differential Gene expression and Enrichment analysis ( $p_{adj} < 0.05$ ) for cluster 5

G: Differential Gene expression and Enrichment analysis ( $p_{adj} < 0.05$ ) for cluster 6

H: Differential Gene expression and Enrichment analysis ( $p_{adj} < 0.05$ ) for cluster 7

I: Differential Gene expression and Enrichment analysis ( $p_{adj} < 0.05$ ) for cluster 8

## Supplementary Data 7: Annotation of human fibroblast clusters

A: Results of DGE between mapCAFs and other cells of the fibroblast cluster from human sc-RNAseq data

B: Genes of the human mapCAF signature
